# Supplementary material for: Electrospray deposition of a Co3O4nanoparticles–graphene composite for a binder-free lithium ion battery electrode
Source: Royal Society of Chemistry journal article supplement (doi:10.1039/c3ra45571h), 2013-10-14
Supplement: c3ra45571h.pdf [file c3ra45571h.pdf]

## Supplementary information

### Electrospray deposition of $\text{Co}_3\text{O}_4$ nanoparticle and graphene composite for binder-free lithium ion battery electrodes

Tao Hu,<sup>a,b</sup> Guoqing Xin,<sup>b</sup> Hongtao Sun,<sup>b</sup> Xiang Sun,<sup>b</sup> Mingpeng Yu,<sup>b</sup>

5

Changsheng Liu,<sup>a</sup> Jie Lian<sup>\*b</sup>

<sup>a</sup>Key Laboratory for Anisotropy and Texture of Materials of Ministry of Education, Northeastern

University, Shenyang, Liaoning 110004, China

<sup>b</sup>Department of Mechanical, Aerospace & Nuclear Engineering, Rensselaer Polytechnic Institute, Troy,

NY 12180, USA, Fax: +1 518 276 6025. E-mail: lianj@rpi.edu.

10

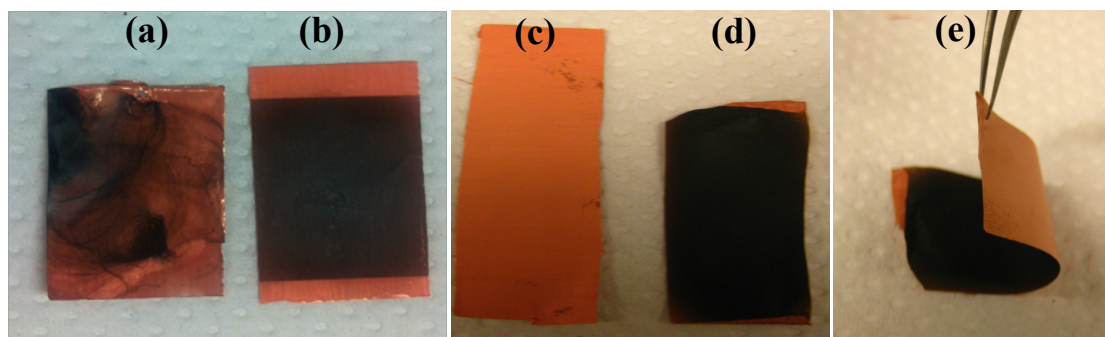

**Figure S1.** The optical image showing the uniform coating of the  $\text{GO-Co}_3\text{O}_4$  film (b) on Cu foils by direct electrospray deposition as compared to dip coating process (a); the bare Cu foil (c) and flexible  $\text{G-Co}_3\text{O}_4$  film (c and e)

15

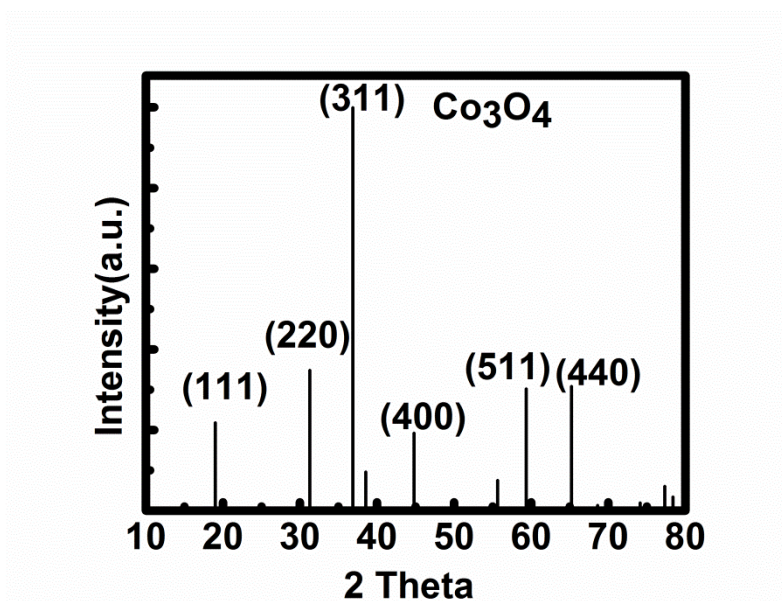

**Figure S2.** The standard XRD pattern of  $\text{Co}_3\text{O}_4$  (JCPDS No. 42-1467)

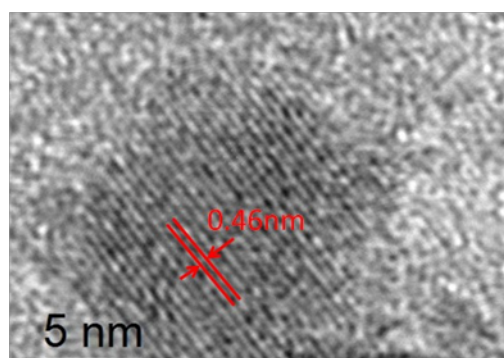

**Figure S3.** TEM lattice image of a  $\text{Co}_3\text{O}_4$  nanoparticle with an interplanar spacing (0.46 nm),

5

corresponding to (111) planes of the cubic phase of  $\text{Co}_3\text{O}_4$ .

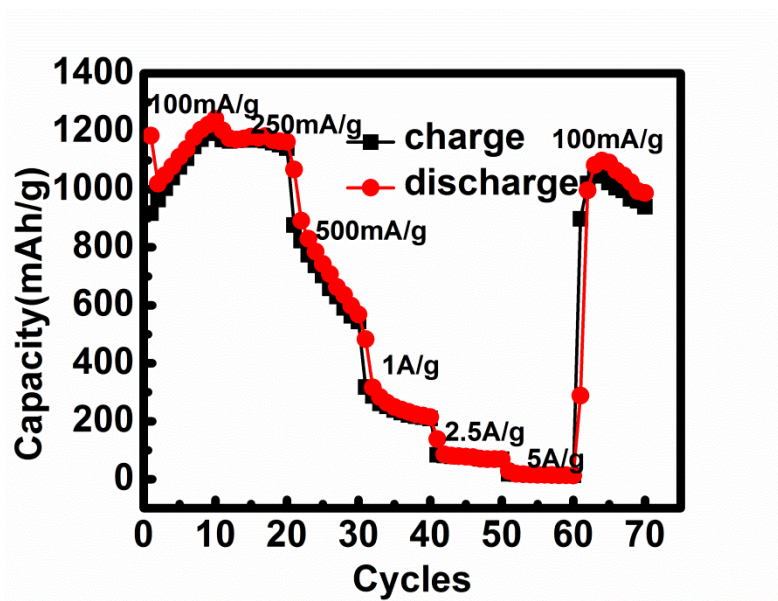

**Figure S4.** Cycling performance of  $\text{Co}_3\text{O}_4$  with binder electrode (as a control experiment) at different scan rates from  $100 \text{ mA g}^{-1}$  to  $5 \text{ A g}^{-1}$ .
